# Supplementary material
Source: MDPI journal article supplement (https://www.mdpi.com/2227-9717/10/4/682)
Supplement: s1 [file s1]

**Table S1.** The OTU richness, diversity indices, evenness and estimated OTU richness of urban trees across treatments at both sites. Diospyros = *D. blancoi*, Ficus = *F. microcarpa*, Swietenia = *S. macrophylla*, Melia = *M. azedarach*, Podocarpus = *P. nakaii*. 0-1\_I ~ 0-3\_I denotes the original soil; I and II denote after addition of biochar and of biochar/compost in combination, respectively.

|                 | OTU  | Simpson_1-D | Shannon_H | Evenness | Chao1 |
|-----------------|------|-------------|-----------|----------|-------|
| Diospyros_0-1_I | 5918 | 0.995       | 6.367     | 0.098    | 9104  |
| Diospyros_0-2_I | 5167 | 0.994       | 6.367     | 0.113    | 9015  |
| Diospyros_0-3_I | 4625 | 0.995       | 6.348     | 0.124    | 8611  |
| Diospyros_1_I   | 7845 | 0.994       | 6.400     | 0.077    | 12080 |
| Diospyros_1_II  | 6604 | 0.994       | 6.444     | 0.095    | 11320 |
| Diospyros_2_I   | 5969 | 0.993       | 6.298     | 0.091    | 10370 |
| Diospyros_2_II  | 7678 | 0.995       | 6.557     | 0.092    | 12180 |
| Diospyros_3_I   | 5370 | 0.995       | 6.551     | 0.130    | 8987  |
| Diospyros_3_II  | 4913 | 0.995       | 6.492     | 0.134    | 8712  |
| Diospyros_4_I   | 6972 | 0.995       | 6.465     | 0.092    | 11160 |
| Diospyros_4_II  | 5614 | 0.995       | 6.619     | 0.133    | 10040 |
| Ficus_1_I       | 4533 | 0.996       | 6.799     | 0.198    | 8495  |
| Ficus_1_II      | 4959 | 0.997       | 6.855     | 0.191    | 8695  |
| Ficus_2_I       | 6544 | 0.997       | 6.940     | 0.158    | 11200 |
| Ficus_2_II      | 7202 | 0.996       | 6.808     | 0.126    | 12090 |
| Melia_I         | 5248 | 0.996       | 6.706     | 0.156    | 9532  |
| Melia_II        | 4385 | 0.996       | 6.723     | 0.190    | 8427  |
| Podocarpus_I    | 5549 | 0.996       | 6.749     | 0.154    | 9585  |
| Podocarpus_II   | 5156 | 0.995       | 6.659     | 0.151    | 8983  |
| Swietenia_I     | 4337 | 0.996       | 6.749     | 0.197    | 8475  |
| Swietenia_II    | 4171 | 0.996       | 6.842     | 0.225    | 8505  |

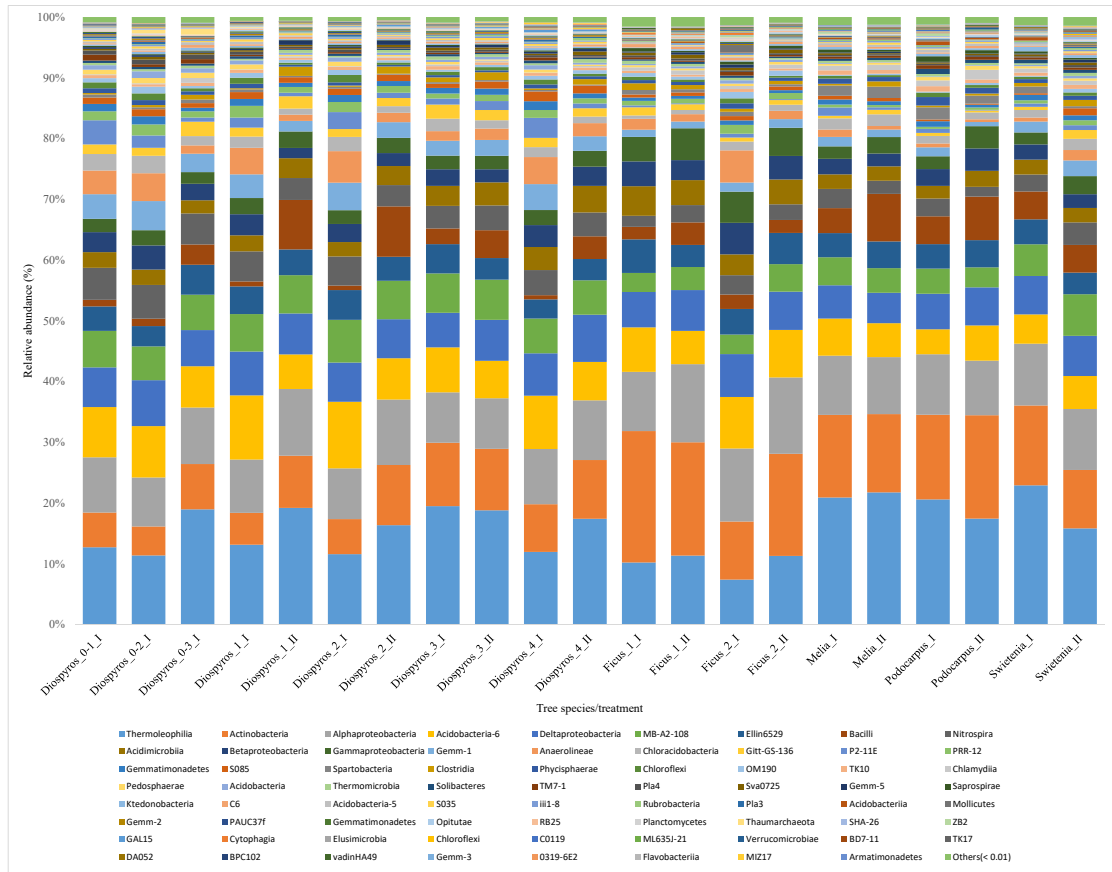

**Figure S1.** The dominant bacterial community composition ( $> 0.01$ ) at class level across treatments of urban trees at both sites. Diospyros = *D. blancoi*, Ficus = *F. microcarpa*, Swietenia = *S. macrophylla*, Melia = *M. azedarach*, Podocarpus = *P. nakaii*. 0-1\_I ~ 0-3\_I denotes the original soil; I and II denote after addition of biochar and of biochar/compost in combination, respectively.
